# Supplementary material for: Analysis of the electrostatics in DyIIIsingle-molecule magnets: the case study of Dy(Murex)3
Source: Royal Society of Chemistry journal article supplement (doi:10.1039/c5dt03345d), 2015-01-01
Supplement: c5dt03345d1.pdf [file c5dt03345d1.pdf]

## Analysis of the electrostatics in Dy<sup>III</sup> single-molecule magnet: the case study of Dy(Murex)<sub>3</sub>

J. Jung,<sup>a</sup> X. Yi,<sup>b</sup> G. Huang,<sup>b</sup> G. Calvez,<sup>b</sup> C. Daiguebonne,<sup>b</sup> O. Guillou,<sup>b</sup> O. Cador,<sup>c</sup> A. Caneschi,<sup>d</sup> T. Roisnel,<sup>a</sup> B. Le Guennic<sup>a\*</sup> and K. Bernot<sup>b\*</sup>

### SUPPLEMENTARY INFORMATION

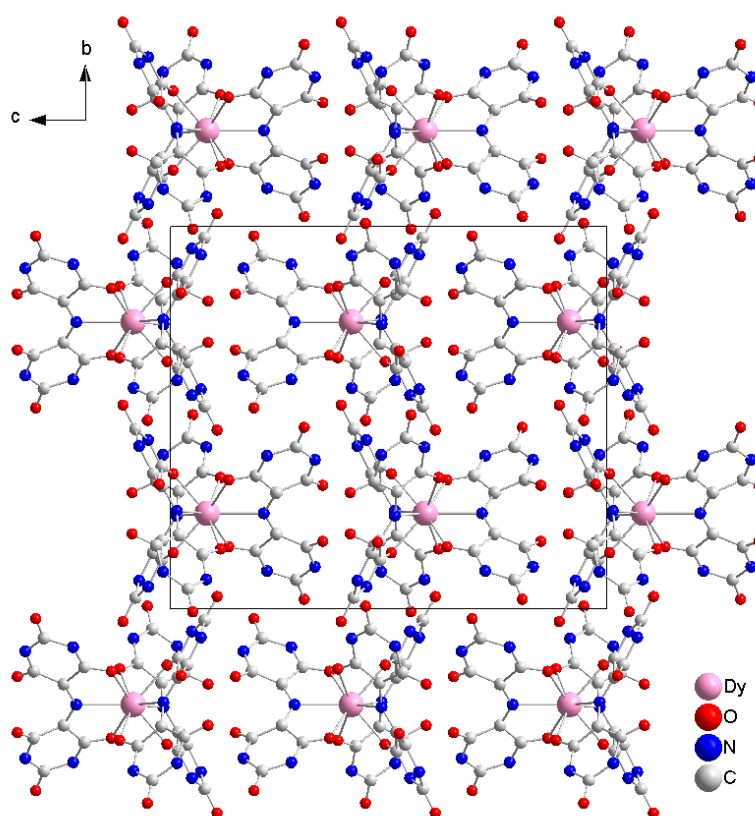

Figure S1. View of the crystal packing of **1** along the a axis (H atoms, water molecules and complexes from neighbouring cell omitted for clarity).

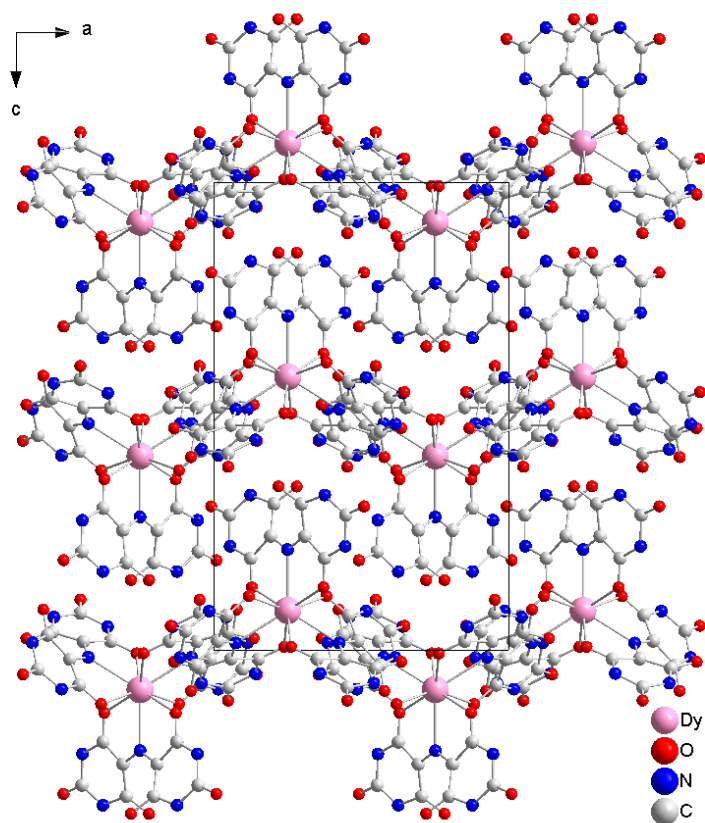

Figure S2. View of the crystal packing of **1** along the b axis (H atoms, water molecules and complexes from neighbouring cell omitted for clarity).

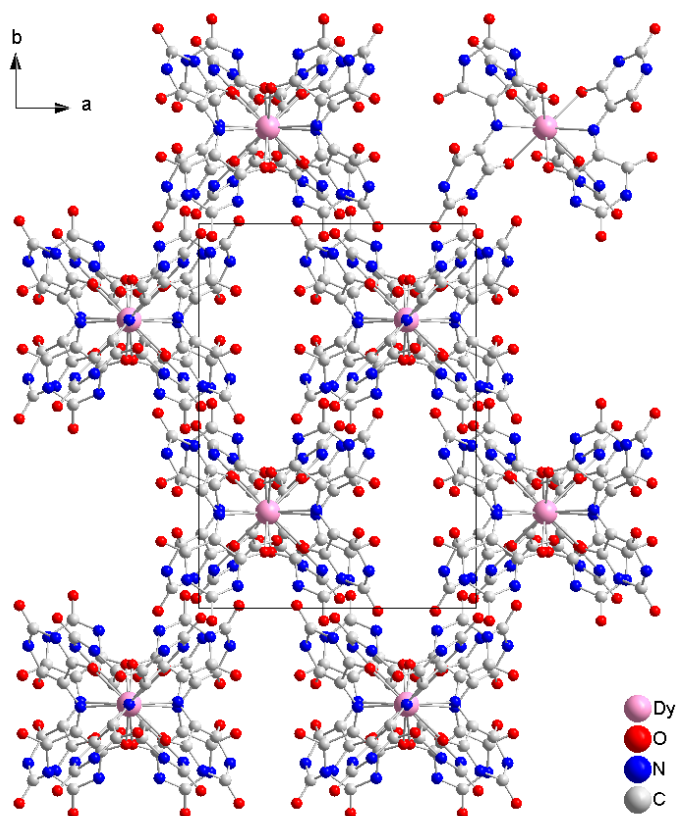

Figure S3. View of the crystal packing of **1** along the c axis (H atoms, water molecules and complexes from neighbouring cell omitted for clarity).

Table S1. Main crystallographic parameters.

|                                                        |                                                                    |
|--------------------------------------------------------|--------------------------------------------------------------------|
| Compound                                               | <b>1</b>                                                           |
| CCDC number                                            | 1409034                                                            |
| Formula                                                | C <sub>24</sub> H <sub>12</sub> Dy N <sub>15</sub> O <sub>18</sub> |
| M / g.mol <sup>-1</sup>                                | 960.99                                                             |
| Crystal system                                         | Orthorhombic                                                       |
| Space group                                            | P c c n                                                            |
| Cell parameters                                        | 12.4420(2)<br>17.2570(3)<br>19.7040(5)                             |
| Volume / Å <sup>3</sup>                                | 4230.68(17)                                                        |
| Cell formula units                                     | 4                                                                  |
| T / K                                                  | 150                                                                |
| λ (Å)                                                  | 0.71073                                                            |
| Θ range                                                | 2.03-27.50                                                         |
| Number of reflections                                  | 20045                                                              |
| Independent reflections                                | 4848                                                               |
| Fo > 4σ Fo)                                            | 3140                                                               |
| Number of variables                                    | 263                                                                |
| μ                                                      | 1.850                                                              |
| Highest difference peak<br>Largest diff. peak and hole | 0.797 and -1.63 e.Å <sup>-3</sup>                                  |
| Goof, R <sub>1</sub> , wR <sub>2</sub>                 | 1.073, 0.0406, 0.1532                                              |

$$R_{int} = \frac{\sum |F_o^2 - \langle F_o^2 \rangle|}{\sum F_o^2}$$

$$S = \left\{ \frac{\sum [w(F_o^2 - F_c^2)^2]}{n - p} \right\}^2$$

$$R_1 = \frac{\sum |F_o| - |F_c|}{\sum F_o}$$

$$wR_2 = \left\{ \frac{\sum [w(F_o^2 - F_c^2)^2]}{\sum [w(F_o^2)^2]} \right\}^{1/2}$$

$$w = 1 / \left[ \sigma(F_o^2) + (aP)^2 + bP \right]$$

$$\text{with } P = \left[ 2F_c^2 + \text{Max}(F_o^2, 0) \right] / 3$$

Table S2. Selected bond lengths (Å).

|         | bond lengths (Å) |
|---------|------------------|
| Dy1-O6  | 2.344(4)         |
| Dy1-O2  | 2.356(4)         |
| Dy1-O5  | 2.375(4)         |
| Dy1-N7  | 2.573(5)         |
| Dy1-N8  | 2.570(7)         |
| Dy1-Dy1 | 9.852(5)         |

Table S3. Selected angles (°).

| Atom 1 | Symmetry 1      | Atom 2 | Symmetry 2 | Atom 3 | Symmetry 3      | Angle      |
|--------|-----------------|--------|------------|--------|-----------------|------------|
| O6     | x, y, z         | Dy1    | x, y, z    | O6     | 0.5-x, 0.5-y, z | 130.71(19) |
| O6     | x, y, z         | Dy1    | x, y, z    | O2     | 0.5-x, 0.5-y, z | 75.15(13)  |
| O6     | 0.5-x, 0.5-y, z | Dy1    | x, y, z    | O2     | 0.5-x, 0.5-y, z | 142.95(12) |
| O6     | x, y, z         | Dy1    | x, y, z    | O2     | x, y, z         | 142.95(12) |
| O6     | x, y, z         | Dy1    | x, y, z    | O5     | 0.5-x, 0.5-y, z | 83.50(14)  |
| O6     | 0.5-x, 0.5-y, z | Dy1    | x, y, z    | O5     | 0.5-x, 0.5-y, z | 84.30(14)  |
| O6     | 0.5-x, 0.5-y, z | Dy1    | x, y, z    | O5     | x, y, z         | 83.50(14)  |
| O6     | x, y, z         | Dy1    | x, y, z    | O5     | 0.5-x, 0.5-y, z | 83.50(14)  |
| O5     | 0.5-x, 0.5-y, z | Dy1    | x, y, z    | O5     | x, y, z         | 150.49(19) |
| O6     | x, y, z         | Dy1    | x, y, z    | N8     | x, y, z         | 65.36(10)  |
| O2     | 0.5-x, 0.5-y, z | Dy1    | x, y, z    | N8     | x, y, z         | 130.53(9)  |
| O2     | x, y, z         | Dy1    | x, y, z    | N8     | x, y, z         | 130.53(9)  |
| O5     | 0.5-x, 0.5-y, z | Dy1    | x, y, z    | N8     | x, y, z         | 75.24(10)  |
| O5     | x, y, z         | Dy1    | x, y, z    | N8     | x, y, z         | 75.25(10)  |
| O6     | x, y, z         | Dy1    | x, y, z    | N7     | 0.5-x, 0.5-y, z | 69.60(13)  |
| O6     | 0.5-x, 0.5-y, z | Dy1    | x, y, z    | N7     | 0.5-x, 0.5-y, z | 142.42(13) |
| N8     | x, y, z         | Dy1    | x, y, z    | N7     | x, y, z         | 122.16(10) |
| N7     | 0.5-x, 0.5-y, z | Dy1    | x, y, z    | N7     | x, y, z         | 115.69(19) |
| O2     | x, y, z         | Dy1    | x, y, z    | N8     | x, y, z         | 130.53(9)  |
| O5     | 0.5-x, 0.5-y, z | Dy1    | x, y, z    | N8     | x, y, z         | 75.24(10)  |
| O5     | x, y, z         | Dy1    | x, y, z    | N8     | x, y, z         | 75.25(10)  |

Table S4: Wave functions of the 16 spin-orbit states of the ground multiplet. States 1 and 2 correspond to the ground multiplet, states 3 and 4 to the first excited state and so on until the 8<sup>th</sup> Kramer doublet.

|       | 1    | 2    | 3    | 4    | 5    | 6    | 7    | 8    | 9    | 10   | 11   | 12   | 13   | 13   | 14   | 16   |
|-------|------|------|------|------|------|------|------|------|------|------|------|------|------|------|------|------|
| -15/2 | 0,83 | 0,00 | 0,08 | 0,00 | 0,17 | 0,00 | 0,00 | 0,10 | 0,03 | 0,32 | 0,01 | 0,35 | 0,00 | 0,22 | 0,00 | 0,05 |
| -13/2 | 0,17 | 0,01 | 0,53 | 0,14 | 0,37 | 0,25 | 0,13 | 0,16 | 0,09 | 0,11 | 0,27 | 0,21 | 0,30 | 0,43 | 0,12 | 0,09 |
| -11/2 | 0,02 | 0,03 | 0,18 | 0,08 | 0,56 | 0,10 | 0,42 | 0,03 | 0,03 | 0,42 | 0,31 | 0,17 | 0,35 | 0,09 | 0,14 | 0,08 |
| -9/2  | 0,24 | 0,00 | 0,04 | 0,05 | 0,10 | 0,17 | 0,26 | 0,56 | 0,32 | 0,45 | 0,31 | 0,27 | 0,21 | 0,01 | 0,02 | 0,06 |
| -7/2  | 0,43 | 0,01 | 0,20 | 0,08 | 0,20 | 0,21 | 0,07 | 0,44 | 0,15 | 0,17 | 0,02 | 0,51 | 0,09 | 0,37 | 0,08 | 0,17 |
| -5/2  | 0,05 | 0,02 | 0,57 | 0,11 | 0,10 | 0,07 | 0,02 | 0,33 | 0,17 | 0,31 | 0,06 | 0,08 | 0,29 | 0,38 | 0,31 | 0,28 |
| -3/2  | 0,18 | 0,07 | 0,24 | 0,15 | 0,41 | 0,23 | 0,14 | 0,17 | 0,08 | 0,39 | 0,01 | 0,08 | 0,32 | 0,13 | 0,43 | 0,38 |
| -1/2  | 0,06 | 0,06 | 0,39 | 0,20 | 0,11 | 0,28 | 0,06 | 0,19 | 0,22 | 0,07 | 0,38 | 0,22 | 0,09 | 0,06 | 0,40 | 0,50 |
| 1/2   | 0,06 | 0,06 | 0,20 | 0,39 | 0,28 | 0,11 | 0,19 | 0,06 | 0,07 | 0,22 | 0,22 | 0,38 | 0,06 | 0,09 | 0,50 | 0,40 |
| 3/2   | 0,07 | 0,18 | 0,15 | 0,24 | 0,23 | 0,41 | 0,17 | 0,14 | 0,39 | 0,08 | 0,08 | 0,01 | 0,13 | 0,32 | 0,38 | 0,43 |
| 5/2   | 0,02 | 0,05 | 0,11 | 0,57 | 0,07 | 0,10 | 0,33 | 0,02 | 0,31 | 0,17 | 0,08 | 0,06 | 0,38 | 0,29 | 0,28 | 0,31 |
| 7/2   | 0,01 | 0,43 | 0,08 | 0,20 | 0,21 | 0,20 | 0,44 | 0,07 | 0,17 | 0,15 | 0,51 | 0,02 | 0,37 | 0,09 | 0,17 | 0,08 |
| 9/2   | 0,00 | 0,24 | 0,05 | 0,04 | 0,17 | 0,10 | 0,56 | 0,26 | 0,45 | 0,32 | 0,27 | 0,31 | 0,01 | 0,21 | 0,06 | 0,02 |
| 11/2  | 0,03 | 0,02 | 0,08 | 0,18 | 0,10 | 0,56 | 0,03 | 0,42 | 0,42 | 0,03 | 0,17 | 0,31 | 0,09 | 0,35 | 0,08 | 0,14 |
| 13/2  | 0,01 | 0,17 | 0,14 | 0,53 | 0,25 | 0,37 | 0,16 | 0,13 | 0,11 | 0,09 | 0,21 | 0,27 | 0,43 | 0,30 | 0,09 | 0,12 |
| 15/2  | 0,00 | 0,83 | 0,00 | 0,08 | 0,00 | 0,17 | 0,10 | 0,00 | 0,32 | 0,03 | 0,35 | 0,01 | 0,22 | 0,00 | 0,05 | 0,00 |

Table S5: Computed properties of Dy(Murex)<sub>3</sub> for the 8 first KD of the system: relative energy in cm<sup>-1</sup>, magnetic anisotropy tensors and deviation angle between the main magnetic direction of the ground KD and all the other Kramer doublets.

| # Spin-orbit state | Relative energy (cm <sup>-1</sup> ) | Magnetic anisotropy tensor (g <sub>x</sub> , g <sub>y</sub> and g <sub>z</sub> ) | Deviation angle (°) with the main magnetic easy-axis of the ground state |
|--------------------|-------------------------------------|----------------------------------------------------------------------------------|--------------------------------------------------------------------------|
| 1                  | 0                                   | 0.20                                                                             |                                                                          |
|                    |                                     | 0.27                                                                             |                                                                          |
|                    |                                     | 16.58                                                                            |                                                                          |
| 2                  | 24                                  | 3.56                                                                             | 55                                                                       |
|                    |                                     | 3.64                                                                             |                                                                          |
|                    |                                     | 13.26                                                                            |                                                                          |
| 3                  | 52                                  | 7.97                                                                             | 78                                                                       |
|                    |                                     | 6.82                                                                             |                                                                          |
|                    |                                     | 2.47                                                                             |                                                                          |
| 4                  | 73                                  | 10.98                                                                            | 27                                                                       |
|                    |                                     | 6.52                                                                             |                                                                          |
|                    |                                     | 0.52                                                                             |                                                                          |
| 5                  | 99                                  | 10.04                                                                            | 46                                                                       |
|                    |                                     | 7.82                                                                             |                                                                          |
|                    |                                     | 1.03                                                                             |                                                                          |
| 6                  | 165                                 | 7.64                                                                             | 17                                                                       |
|                    |                                     | 5.93                                                                             |                                                                          |
|                    |                                     | 3.59                                                                             |                                                                          |
| 7                  | 214                                 | 9.91                                                                             | 53                                                                       |
|                    |                                     | 7.76                                                                             |                                                                          |
|                    |                                     | 2.32                                                                             |                                                                          |
| 8                  | 337                                 | 0.12                                                                             | 90                                                                       |
|                    |                                     | 0.33                                                                             |                                                                          |
|                    |                                     | 18.78                                                                            |                                                                          |

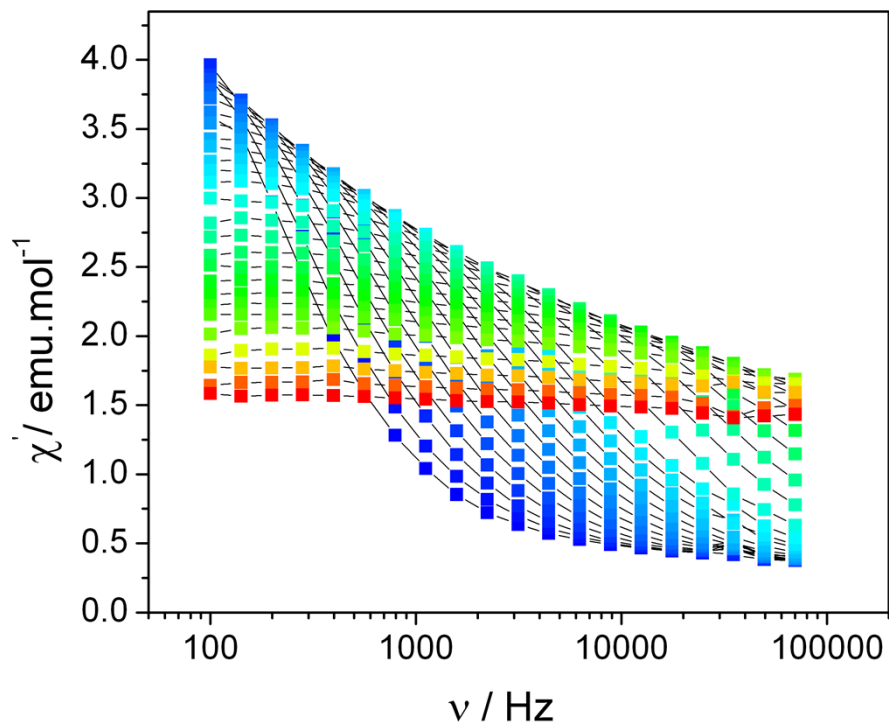

Figure S5. Frequency dependence of the out-of phase susceptibility ( $\chi_M'$ ) with temperature ranging from 1.7 (blue) to 7.1 K (red) measured with a 1500 Oe external dc field.

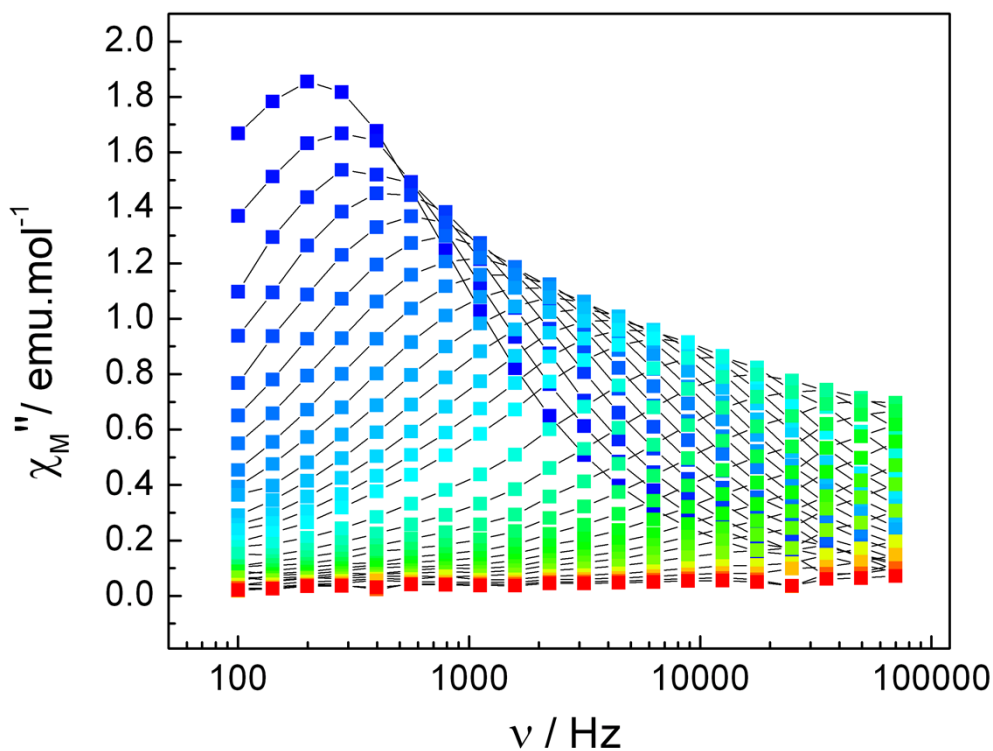

Figure S6. Frequency dependence of the in-phase susceptibility ( $\chi_M''$ ) with temperature ranging from 1.7 (blue) to 7.1 K (red) measured with a 1500 Oe external dc field.



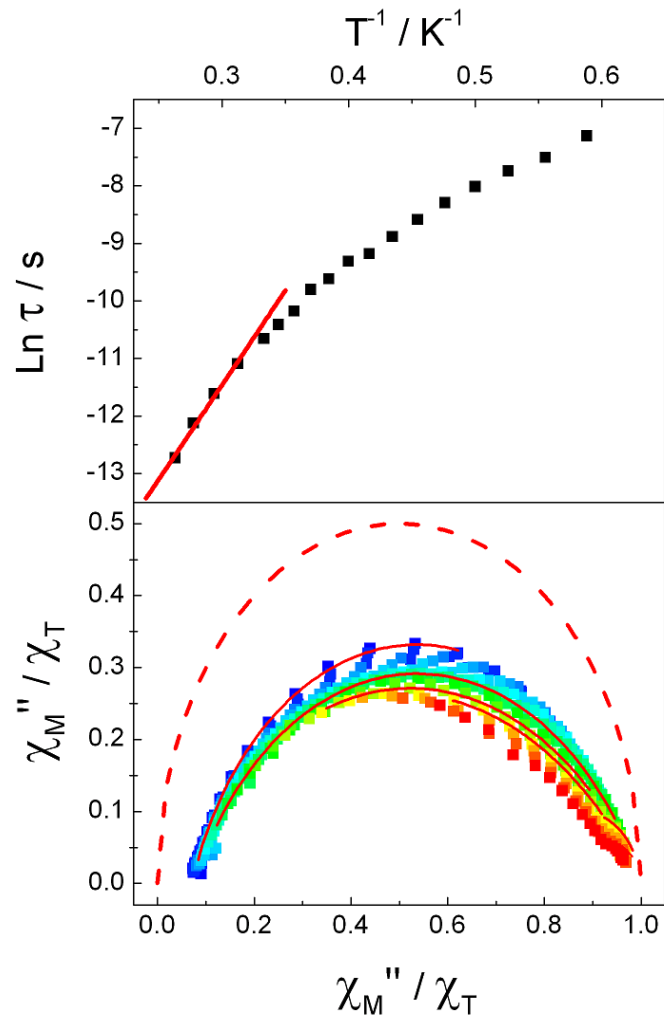

Figure S7. (Top) Arrhenius plot extracted from the in-field measurement of the ac susceptibility with tentative best fit on the highest temperatures. (Bottom) Normalized Argand plot with colour mapping from 1.8 (blue) to 4.2 K (red) with some of the best fits and ideal relaxation curve ( $\alpha=0$ ).

Table S6: extracted values of relaxation rate from the fitting of  $X''$  vs frequency curves

| T(K)                  | $\tau$ ( $\mu$ s)                |
|-----------------------|----------------------------------|
| 1.8                   | 547                              |
| 1.9                   | 432                              |
| 2                     | 329                              |
| 2.1                   | 249                              |
| 2.2                   | 186                              |
| 2.3                   | 138                              |
| 2.4                   | 103                              |
| 2.5                   | 90                               |
| 2.6                   | 66                               |
| 2.7                   | 55                               |
| 2.8                   | 38                               |
| 2.9                   | 30                               |
| 3.0                   | 24                               |
| 3.2                   | 15                               |
| 3.4                   | 9                                |
| 3.6                   | 5                                |
| 3.8                   | 3                                |
| 4.0                   | 1                                |
| 4.2                   | 0.8                              |
| $\Delta = 33 \pm 2$ K | $\tau_0 = 5.5 \times 10^{-10}$ s |

Table S7: extracted values from the fitting of Cole-Cole plots

| T (K) | $\chi_s$ | $\chi_T$ | $\alpha$ | $1 - \chi_s/\chi_T$ |
|-------|----------|----------|----------|---------------------|
| 1.7   | 0.333    | 4.5468   | 0.21     | 0.93                |
| 1.8   | 0.594    | 4.302    | 0.22     | 0.86                |
| 1.9   | 0.576    | 4.14     | 0.24     | 0.86                |
| 2.0   | 0.522    | 4.0428   | 0.24     | 0.87                |
| 2.1   | 0.5382   | 3.8988   | 0.20     | 0.86                |
| 2.2   | 0.459    | 3.798    | 0.21     | 0.86                |
| 2.3   | 0.2628   | 3.627    | 0.24     | 0.88                |
| 2.4   | 0.2592   | 3.5136   | 0.24     | 0.93                |
| 2.5   | 0.261    | 3.4128   | 0.27     | 0.93                |
| 2.6   | 0.2286   | 3.3084   | 0.28     | 0.92                |
| 2.7   | 0.2556   | 3.1554   | 0.28     | 0.93                |
| 2.8   | 0.216    | 2.9808   | 0.29     | 0.92                |
| 2.9   | 0.18     | 2.8278   | 0.30     | 0.93                |
| 3.0   | 0.108    | 2.7018   | 0.28     | 0.94                |
| 3.2   | 0.0054   | 2.592    | 0.30     | 0.96                |
| 3.4   | 0.0032   | 2.4523   | 0.32     | 1.00                |
| 3.6   | 0.0010   | 2.4222   | 0.34     | 0.93                |
| 3.8   | 0.0008   | 2.3800   | 0.37     | 0.86                |

Table S8: calculated charges and potentials

| Dy(Murex) <sub>3</sub> ·11H <sub>2</sub> O |                      |        |                      |
|--------------------------------------------|----------------------|--------|----------------------|
|                                            | Distance<br>Dy-O (Å) | Charge | Potential*<br>(a.u.) |
| N <sub>x</sub>                             | 2.531                | -0.175 | -0.037               |
| N <sub>x</sub>                             | 2.537                | -0.173 | -0.036               |
| N <sub>x</sub>                             | 2.537                | -0.173 | -0.036               |
| O <sub>x</sub>                             | 2.321                | -0.706 | -0.161               |
| O <sub>x</sub>                             | 2.321                | -0.706 | -0.161               |
| O <sub>x</sub>                             | 2.327                | -0.712 | -0.162               |
| O <sub>x</sub>                             | 2.327                | -0.712 | -0.162               |
| O <sub>x</sub>                             | 2.306                | -0.699 | -0.160               |
| O <sub>x</sub>                             | 2.306                | -0.699 | -0.160               |
| Dy                                         |                      | 2.534  |                      |

\*Potentials are calculated as  $q/r$ , where  $q$  is the atomic charge and  $r$  the distance between the Dy and the considered atom atoms.

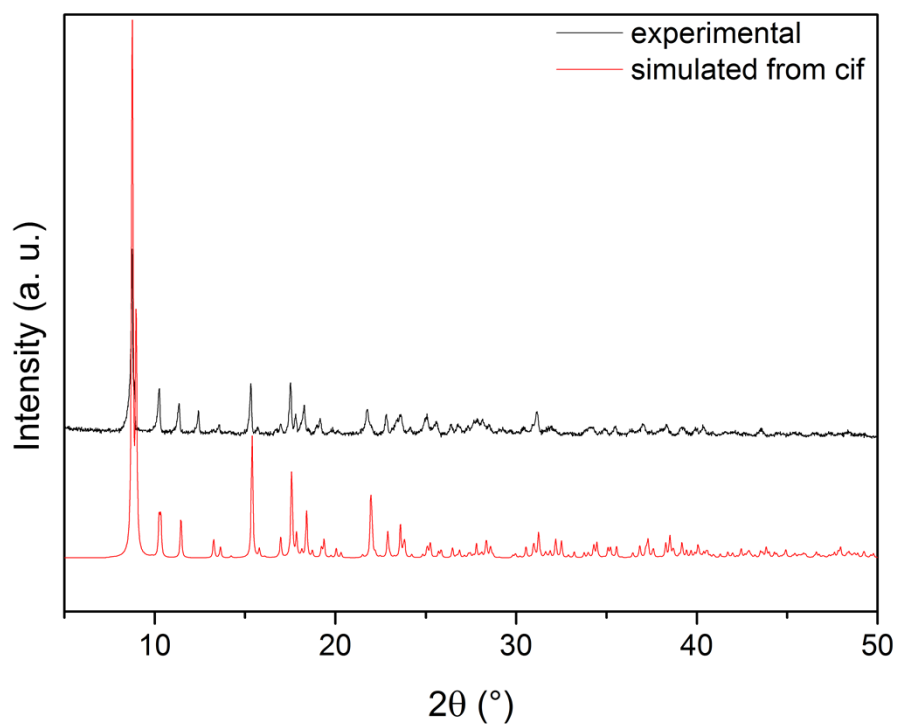

Figure S8. Experimental and simulated X-ray powder diffractograms of **1**.
